# Supplementary material for: Molecular docking and dynamics based approach for the identification of kinase inhibitors targeting PI3Kα against non-small cell lung cancer: a computational study
Source: Royal Society of Chemistry journal article supplement (doi:10.1039/d2ra03451d), 2022-01-01
Supplement: d2ra03451d1.pdf [file d2ra03451d1.pdf]

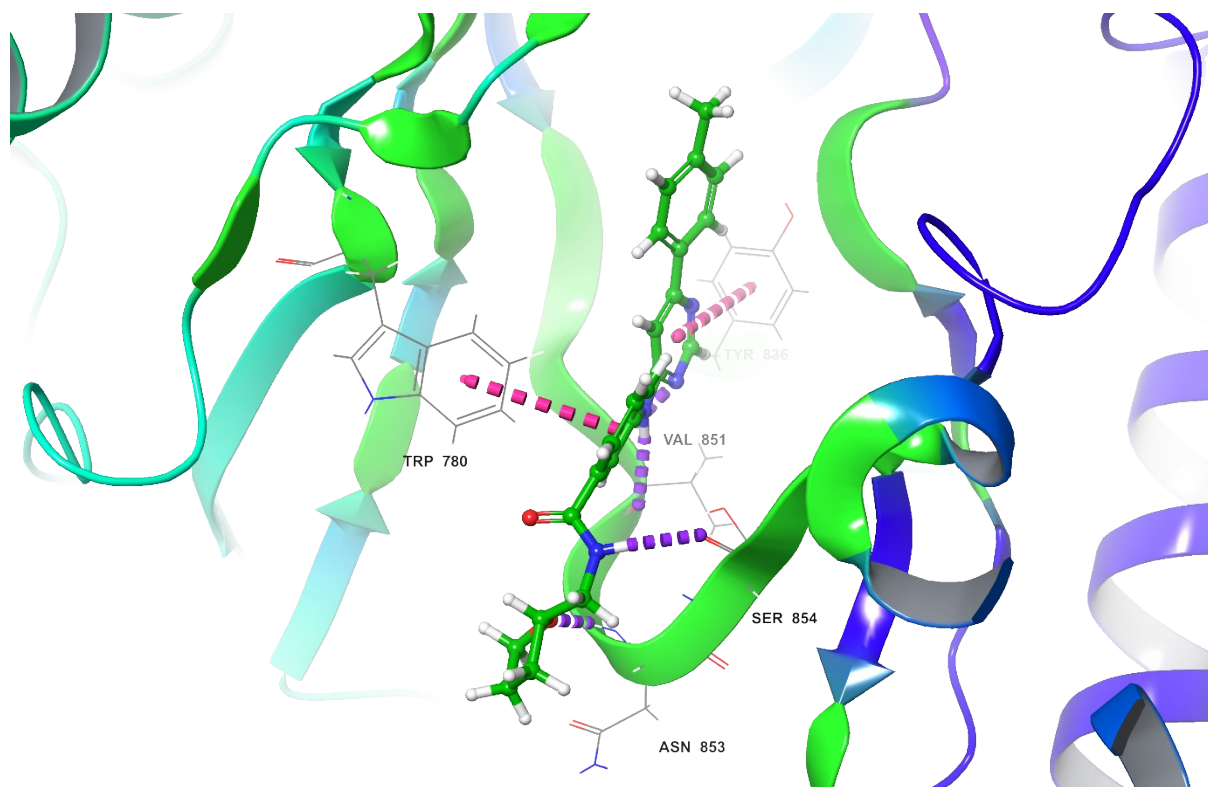

**Supplementary Figure 1: 3D interaction diagram of 6943 and PI3K $\alpha$**

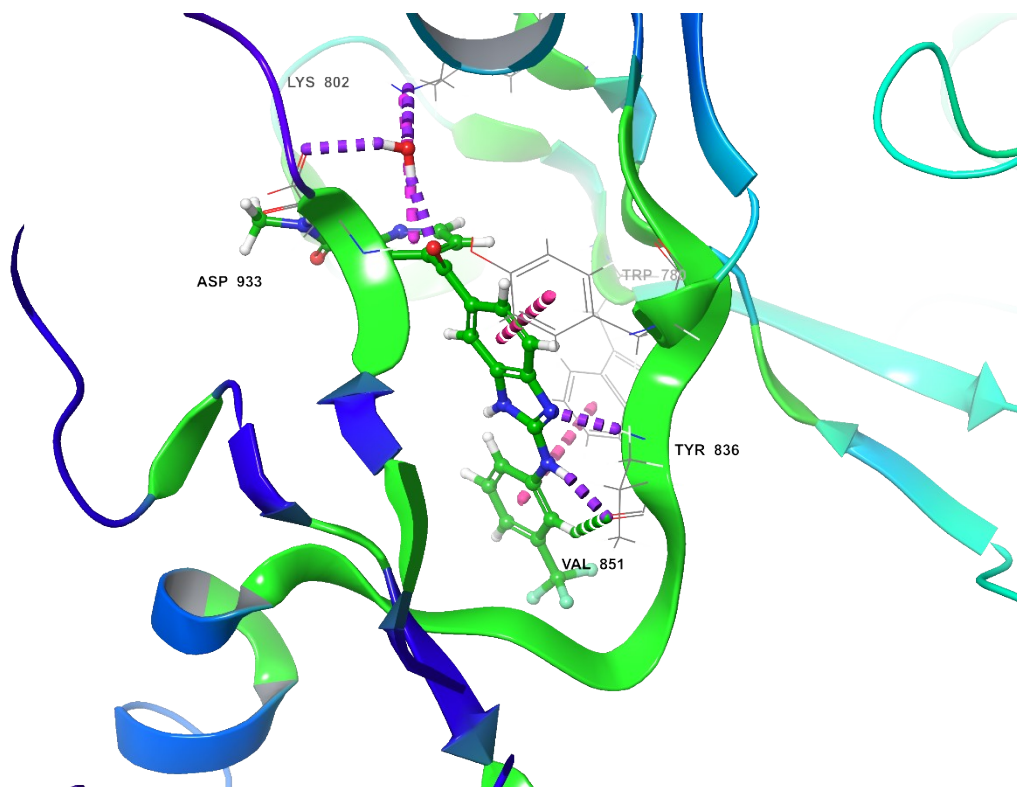

**Supplementary Figure 2: 3D interaction diagram of 34100 and PI3K $\alpha$**

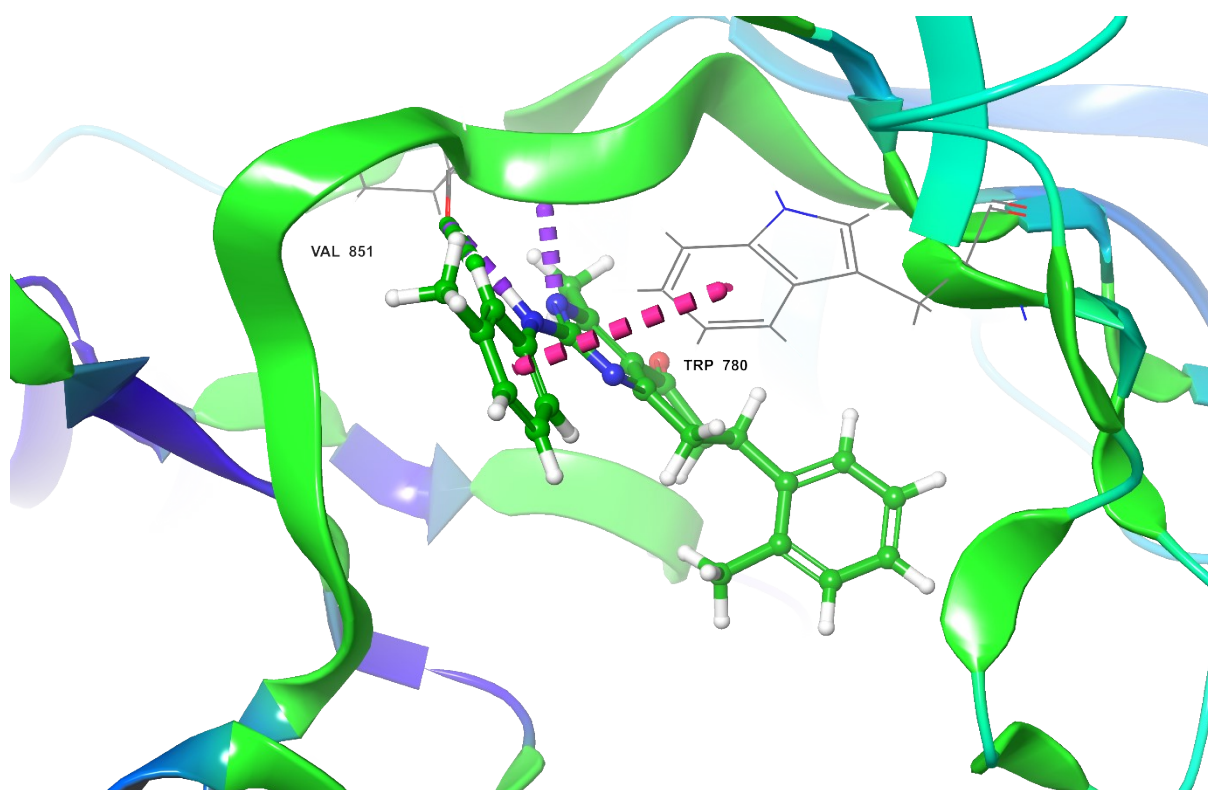

**Supplementary Figure 3: 3D interaction diagram of 31140 and PI3K $\alpha$**

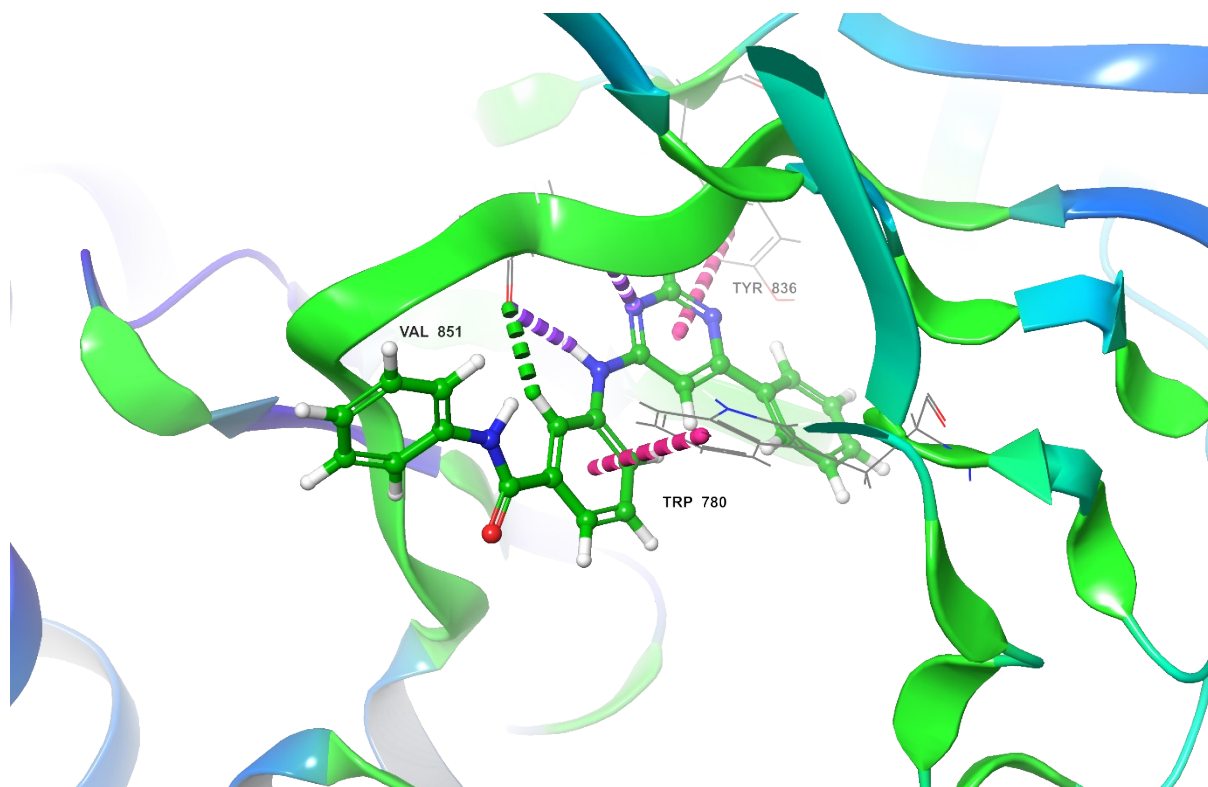

**Supplementary Figure 4: 3D interaction diagram of 12500 and PI3K $\alpha$**

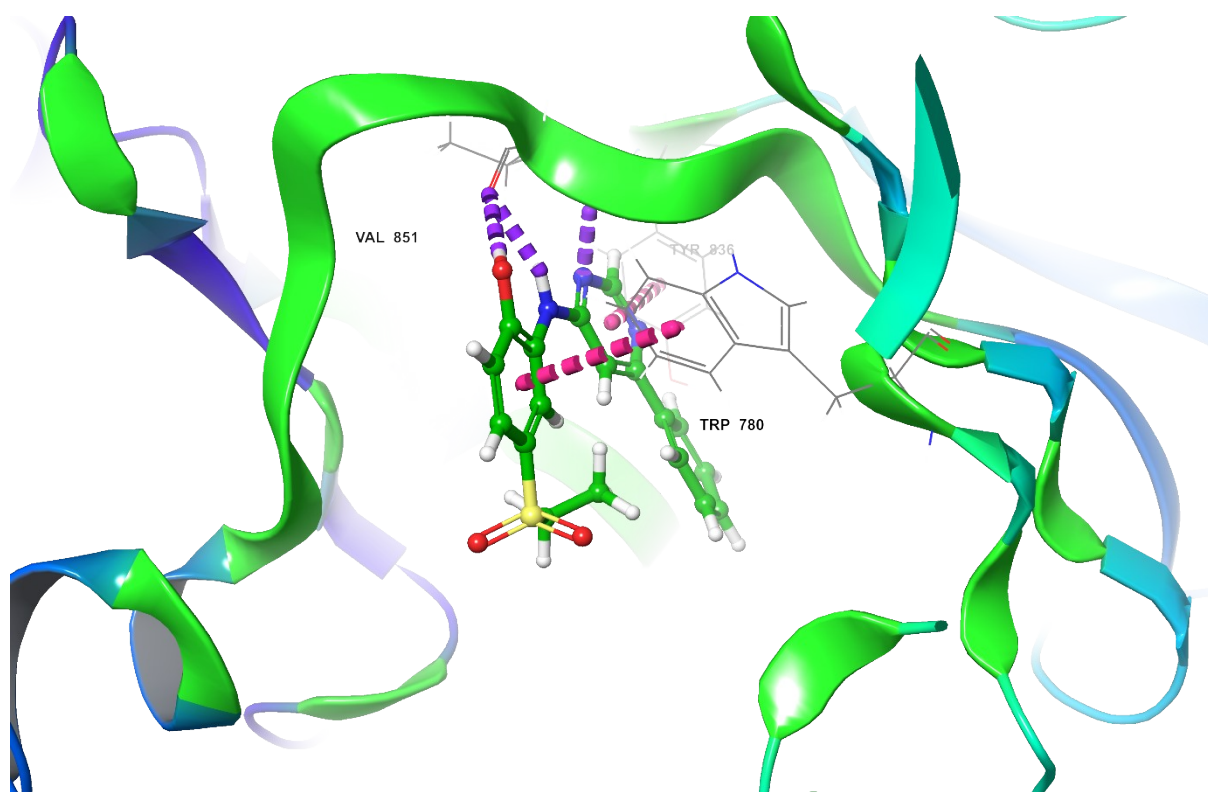

**Supplementary Figure 5: 3D interaction diagram of 14178 and PI3K $\alpha$**

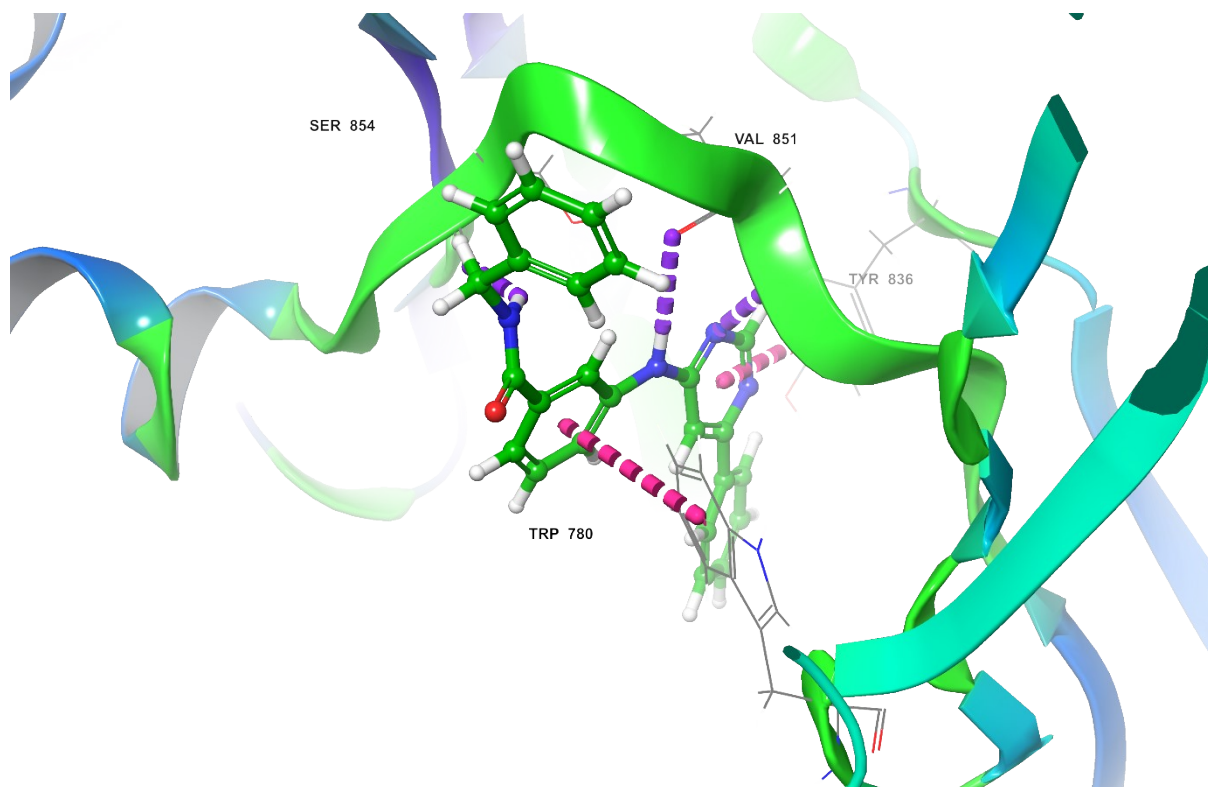

**Supplementary Figure 6: 3D interaction diagram of 7165 and PI3K $\alpha$**

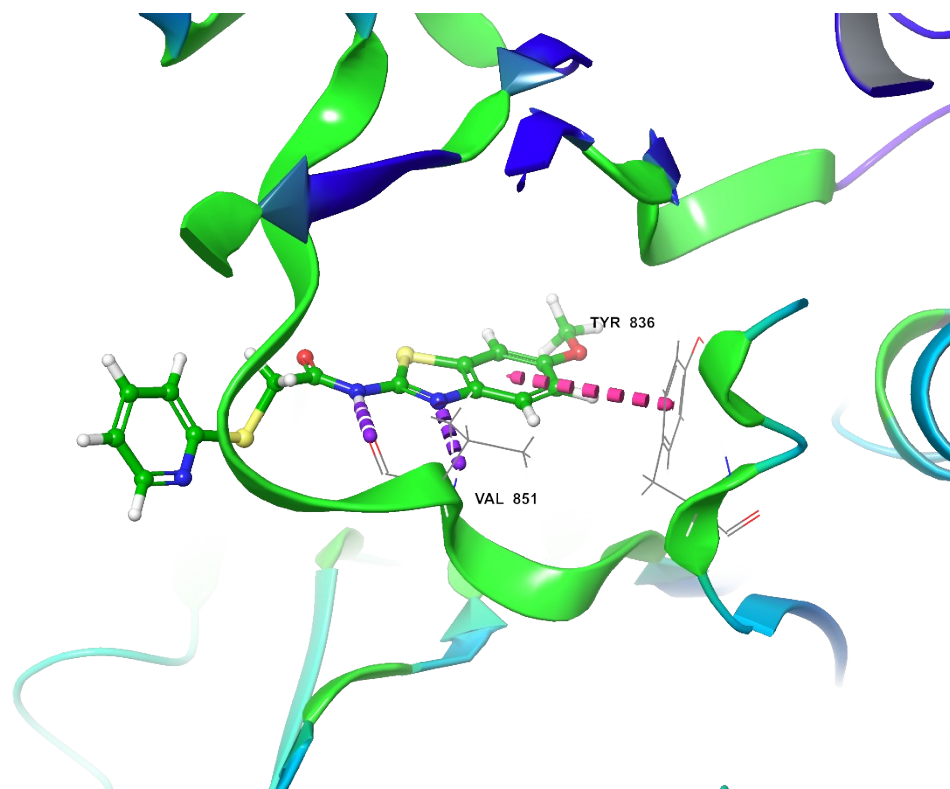

**Supplementary Figure 7: 3D interaction diagram of 438 and PI3K $\alpha$**

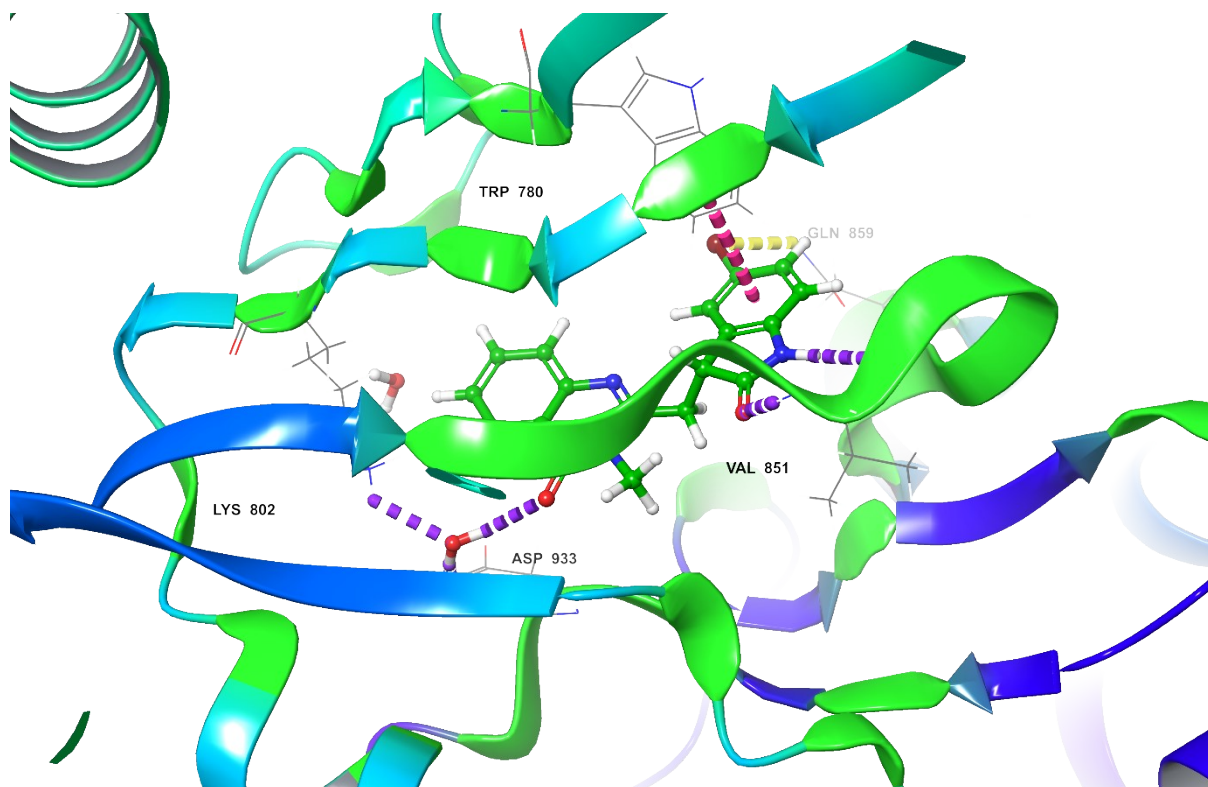

**Supplementary Figure 8: 3D interaction diagram of 6450 and PI3K $\alpha$**



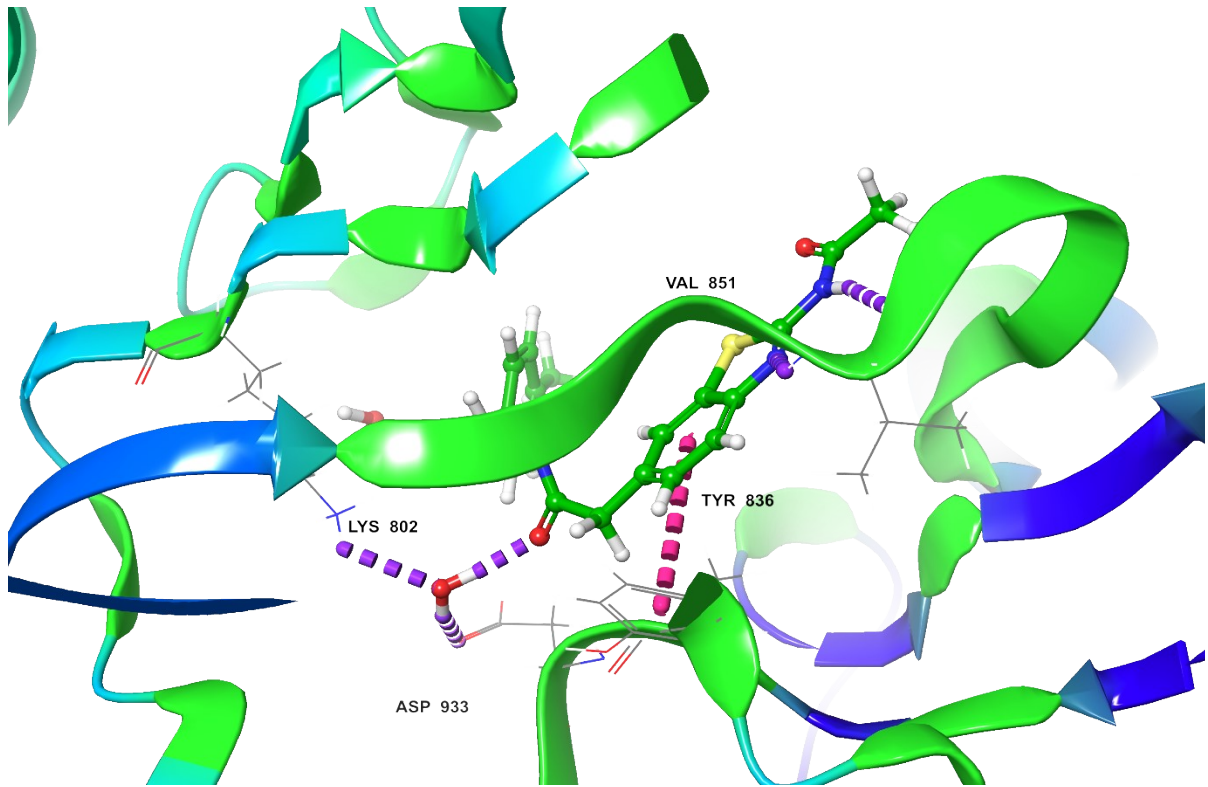

**Supplementary Figure 9: 3D interaction diagram of 19885 and PI3K $\alpha$**

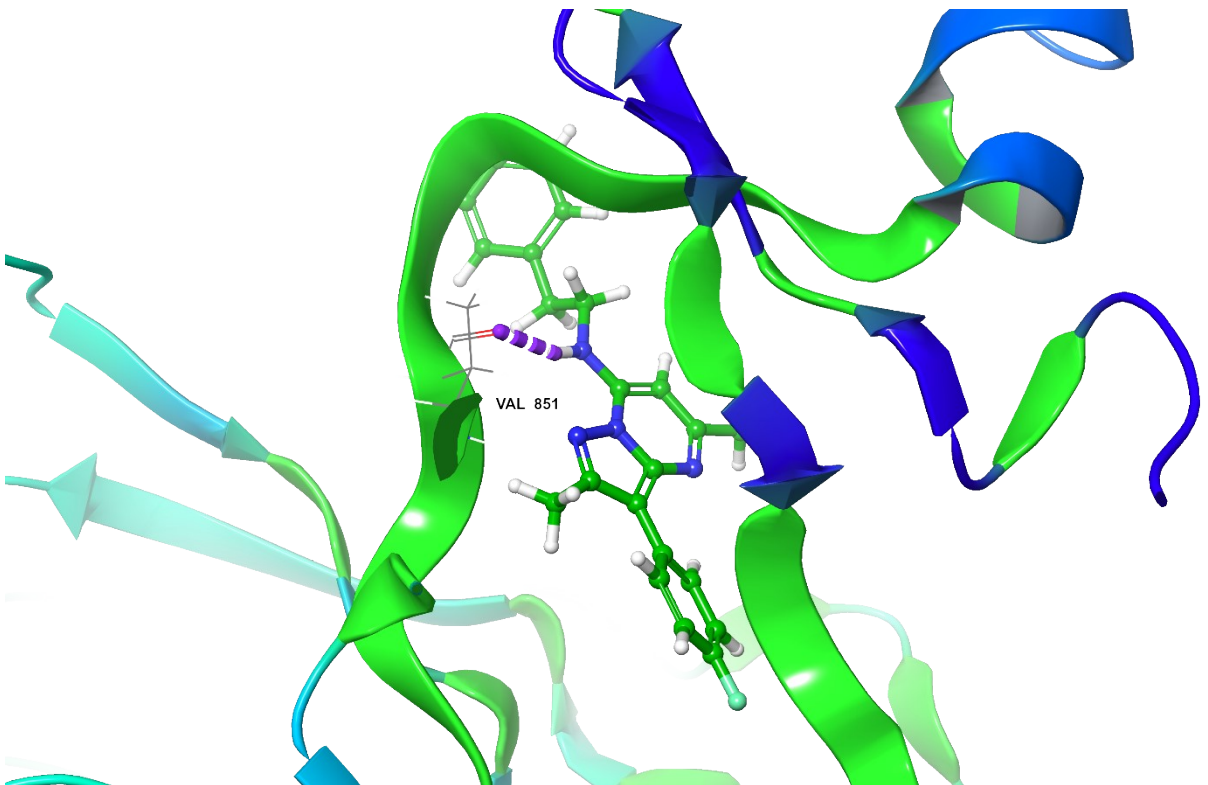

**Supplementary Figure 10: 3D interaction diagram of 16021 and PI3K $\alpha$**

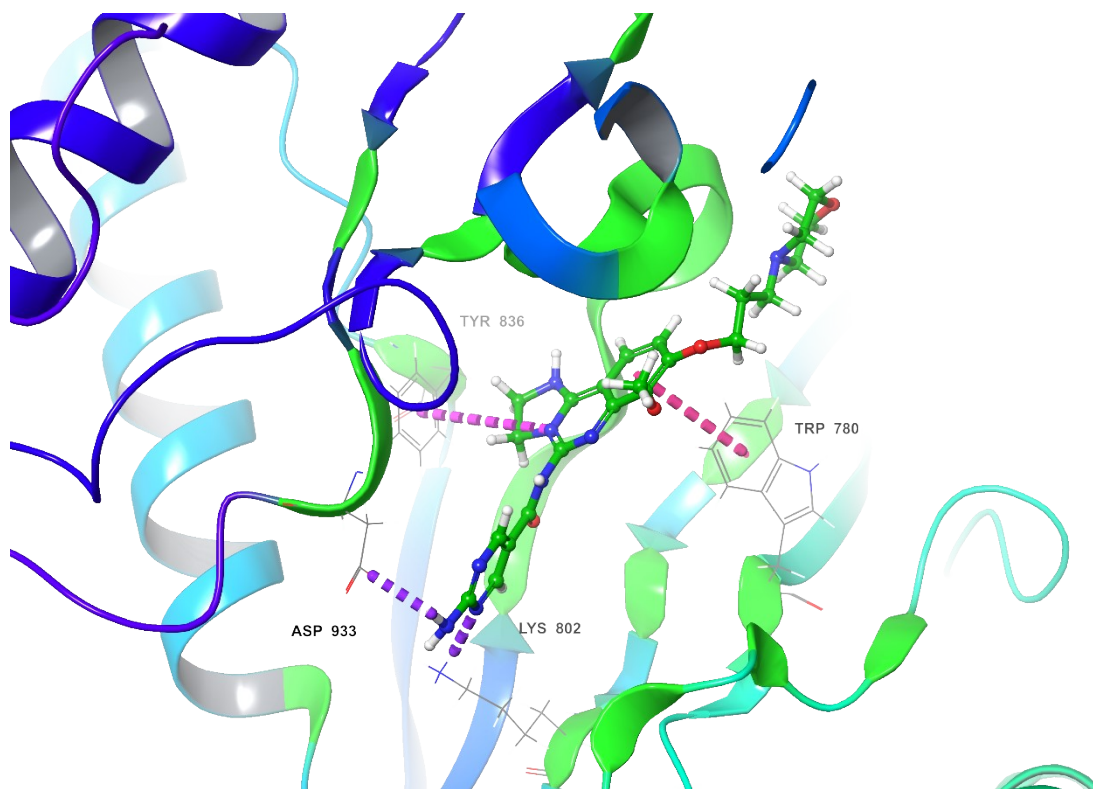

**Supplementary Figure 11: 3D interaction diagram of Copanlisib and PI3K $\alpha$**
